# Supplementary material for: Synthesis and Characterization of Camphorimine Au(I) Complexes with a Remarkably High Antibacterial Activity towards B. contaminans and P. aeruginosa
Source: MDPI journal article supplement (doi:10.3390/antibiotics10101272), 2021-10-19

**Synthesis and characterization of camphorimine Au(I)  
complexes with a remarkably high antibacterial activity towards  
*B. contaminans* and *P. aeruginosa***

**Joana P. Costa <sup>1</sup>, Sílvia A. Sousa <sup>2,3</sup>, Catarina Soeiro <sup>2,3</sup>, Jorge H. Leitão <sup>2,3\*</sup>, Adelino M. Galvão <sup>1</sup>,  
Fernanda Marques, <sup>4</sup> M. Fernanda N.N. Carvalho <sup>1\*</sup>**

<sup>1</sup> Centro de Química Estrutural e Departamento de Engenharia Química, Instituto Superior Técnico, Universidade de Lisboa, Av. Rovisco Pais, 1049-001 Lisboa, Portugal

<sup>2</sup> Instituto de Bioengenharia e Biociências, Departamento de Bioengenharia, Instituto Superior Técnico Universidade de Lisboa, Av. Rovisco Pais, 1049-001 Lisboa, Portugal.

<sup>3</sup> Associate Laboratory, i4HB — Institute for Health and Bioeconomy at Instituto Superior Técnico, Universidade de Lisboa, Av. Rovisco Pais, 1049-001 Lisboa, Portugal

<sup>4</sup> C<sup>2</sup>TN, Centro de Ciências e Tecnologias Nucleares Instituto Superior Técnico, Departamento de Engenharia e Ciências Nucleares, Universidade de Lisboa, Estrada Nacional 10 (km 139,7), 2695-066 Bobadela LRS, Portugal

\* Correspondence: fcarvalho@tecnico.ulisboa.pt (M.F.N.N.C.); jorgeleitao@tecnico.ulisboa.pt (J.H.L.); Tel.: +351-218419178 (M.F.N.N.C.)

## SUPPLEMENTARY DATA

Compound **1** -  $\text{K}[\text{Au}(\text{CN})_2(\text{OC}_{10}\text{H}_{14}\text{NC}_6\text{H}_4\text{NH}_2)] \cdot \text{H}_2\text{O}$

- FTIR

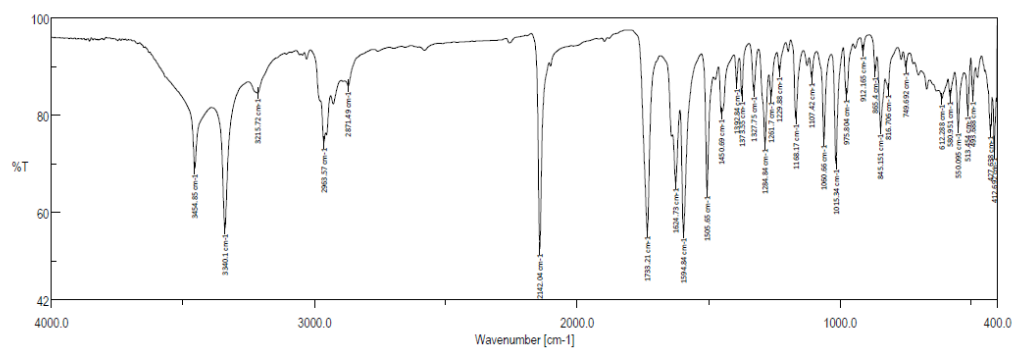

- $^1\text{H}$  NMR

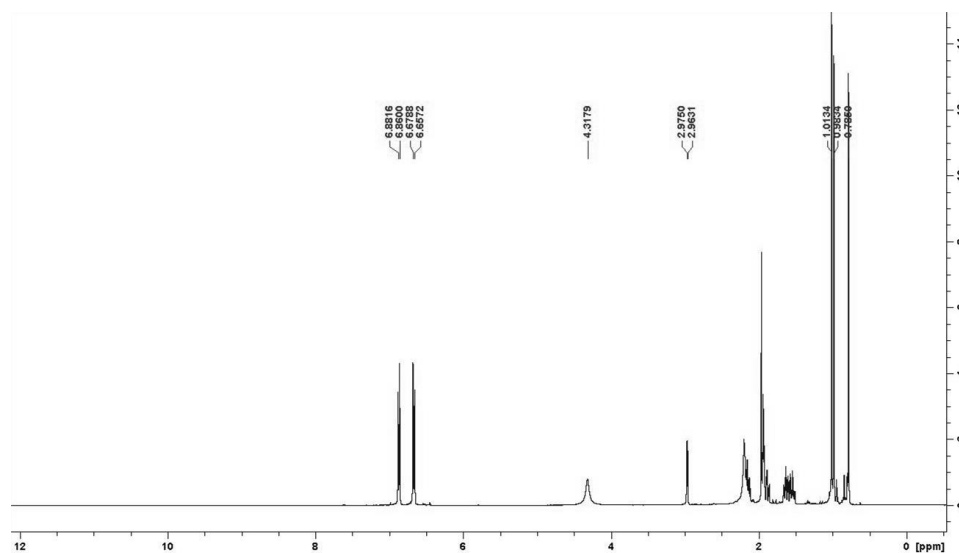

- $^{13}\text{C}$  NMR

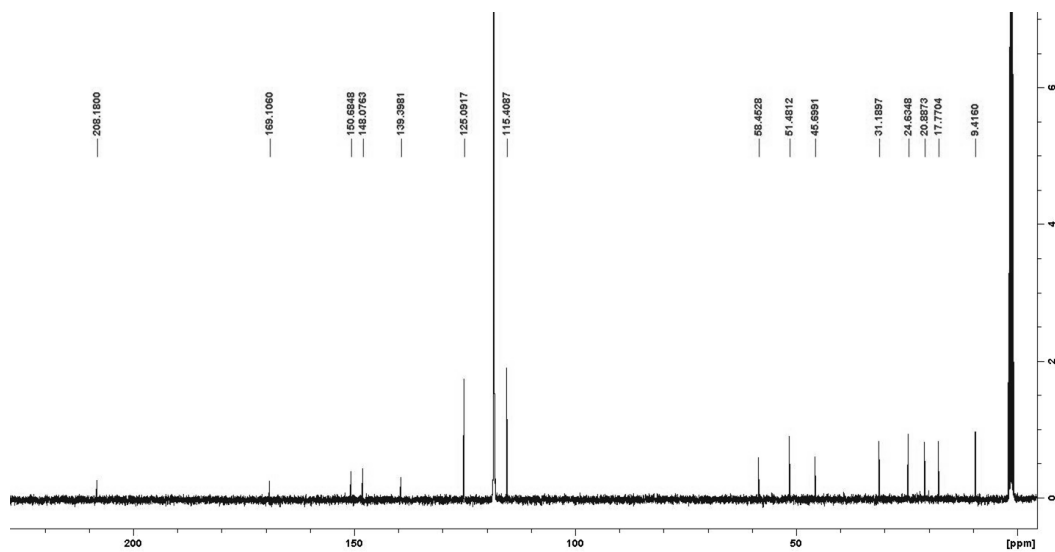

Compound **2** -  $[\text{Au}(\text{CN})(\text{OC}_{10}\text{H}_{14}\text{NC}_6\text{H}_4\text{NH}_2)] \cdot \text{CH}_3\text{CN}$

- FTIR

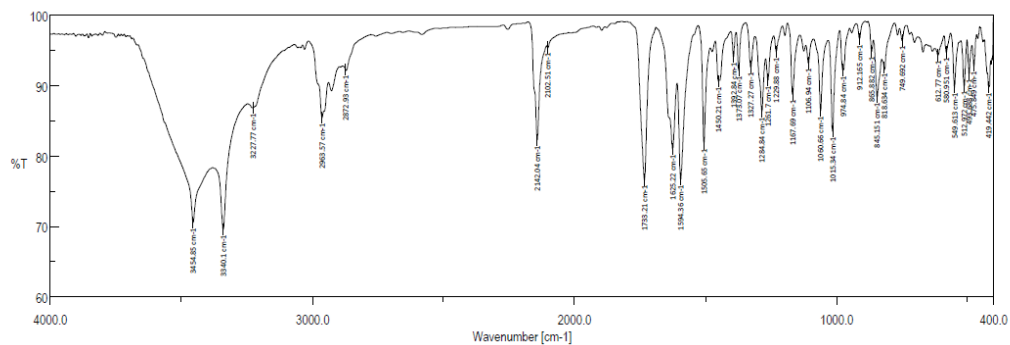

- <sup>1</sup>H NMR

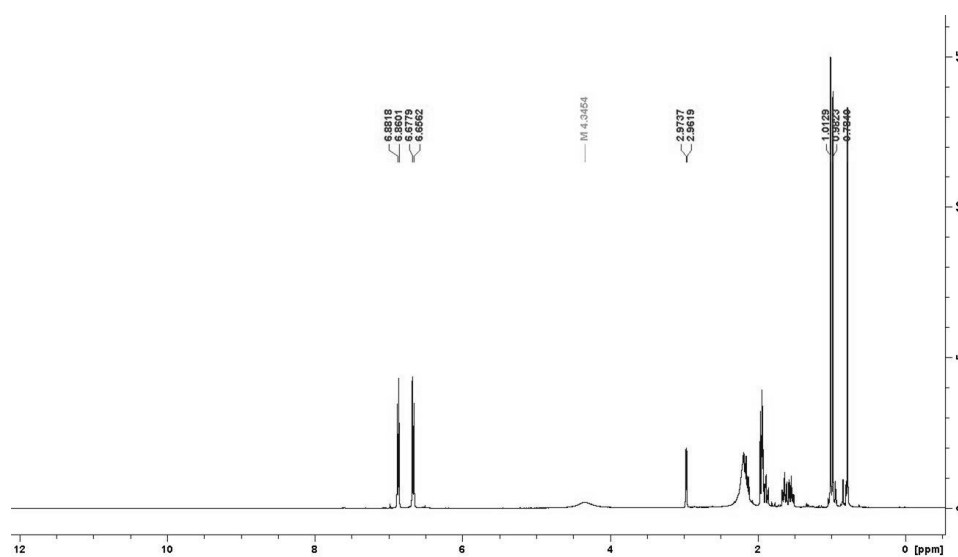

- <sup>13</sup>C NMR

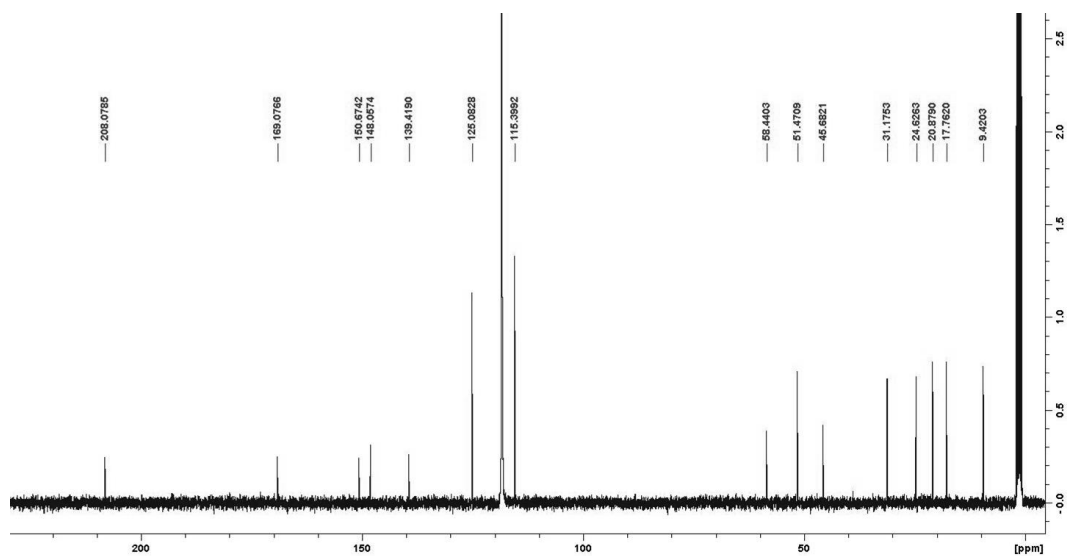

Compound **3** -  $[\text{Au}(\text{CN})(\text{OC}_{10}\text{H}_{14}\text{NC}_6\text{H}_4\text{NH}_2)_3] \cdot \text{H}_2\text{O}$

- FTIR

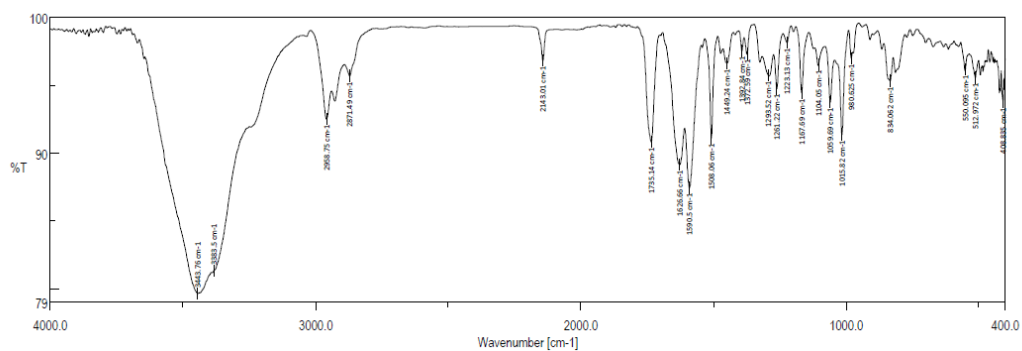

- $^1\text{H}$  NMR

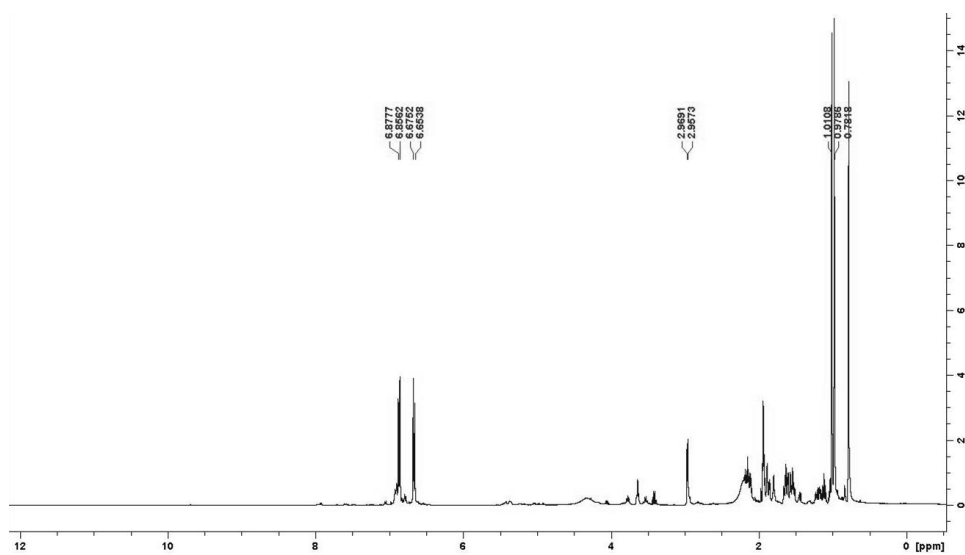

- $^{13}\text{C}$  NMR

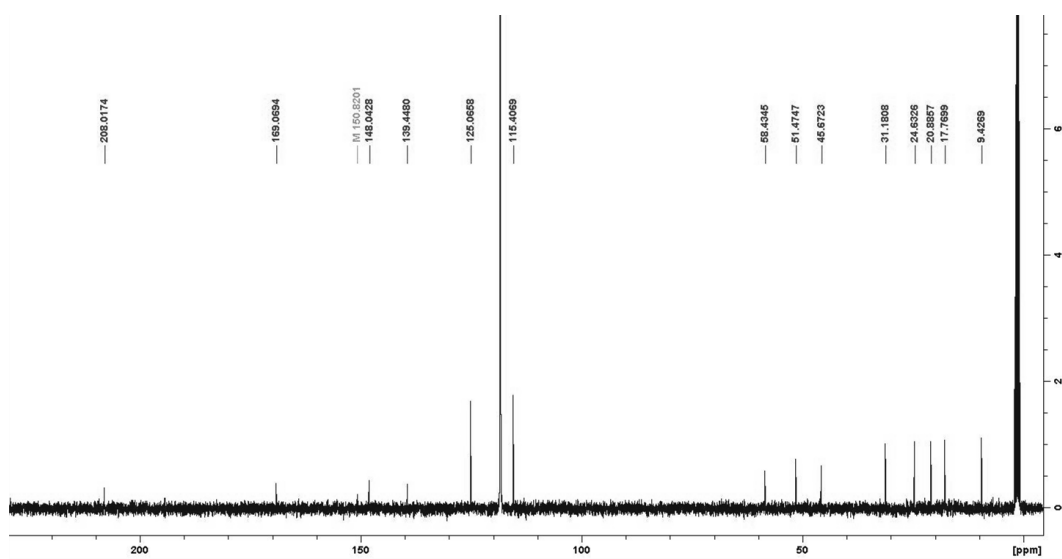

Compound **4** -  $\text{K}[\text{Au}(\text{CN})_2(\text{OC}_{10}\text{H}_{14}\text{NC}_6\text{H}_4\text{CH}_3)]$

- FTIR

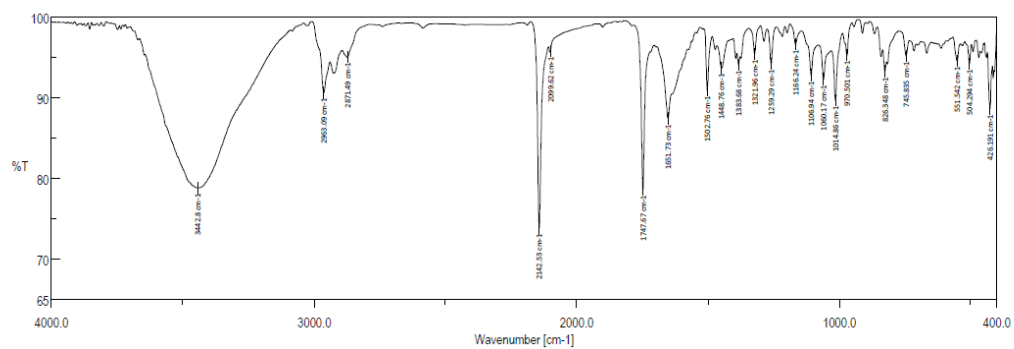

- $^1\text{H}$  NMR

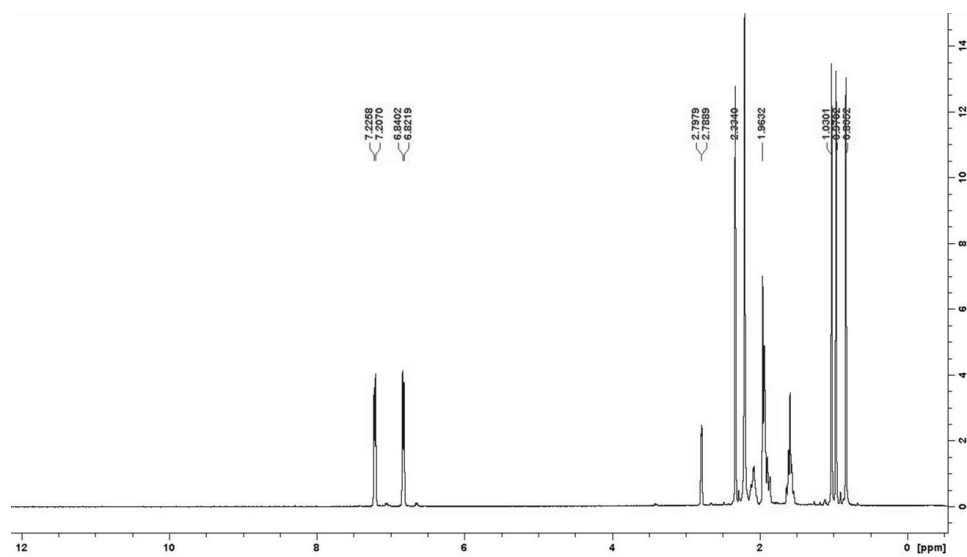

- $^{13}\text{C}$  NMR

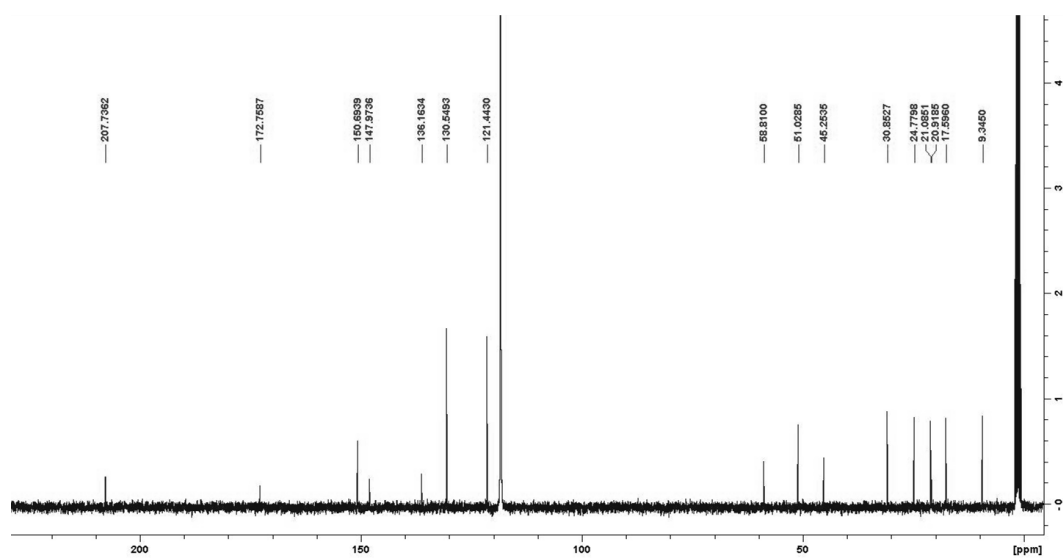

Compound **5** -  $[\text{Au}(\text{CN})(\text{OC}_{10}\text{H}_{14}\text{NC}_6\text{H}_4\text{CH}_3)_2] \cdot \frac{1}{2}\text{CH}_3\text{CN}$

- FTIR

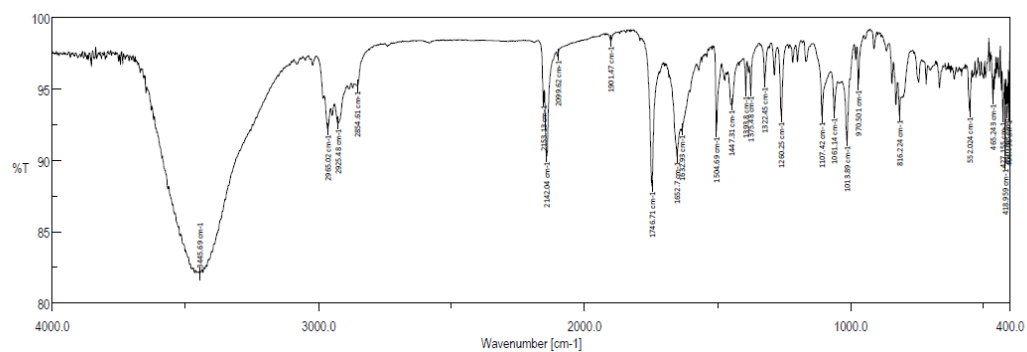

- $^1\text{H}$  NMR

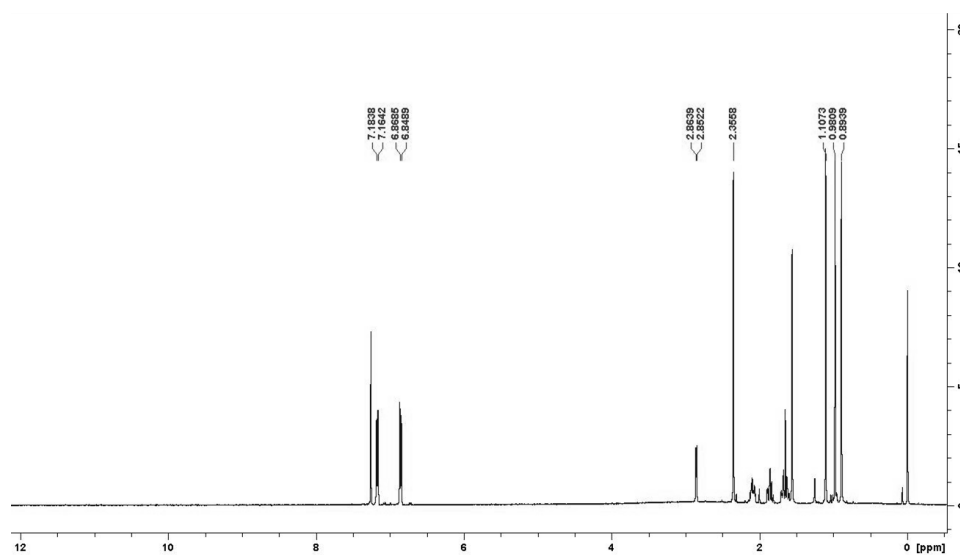

- $^{13}\text{C}$  NMR

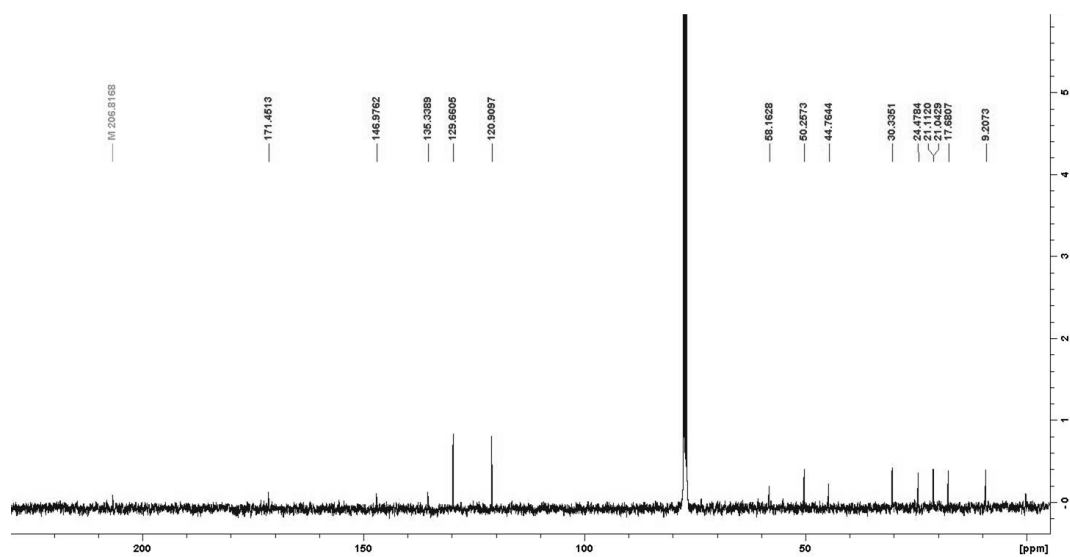

Compound **6** -  $[\{\text{Au}(\text{CN})\}_2(\text{OC}_{10}\text{H}_{14}\text{NC}_6\text{H}_4\text{CH}_3)] \cdot 2\text{H}_2\text{O}$

- FTIR

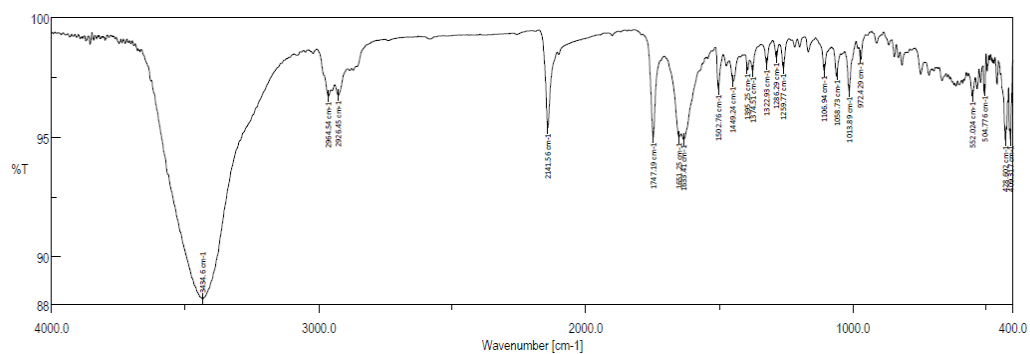

- <sup>1</sup>H NMR

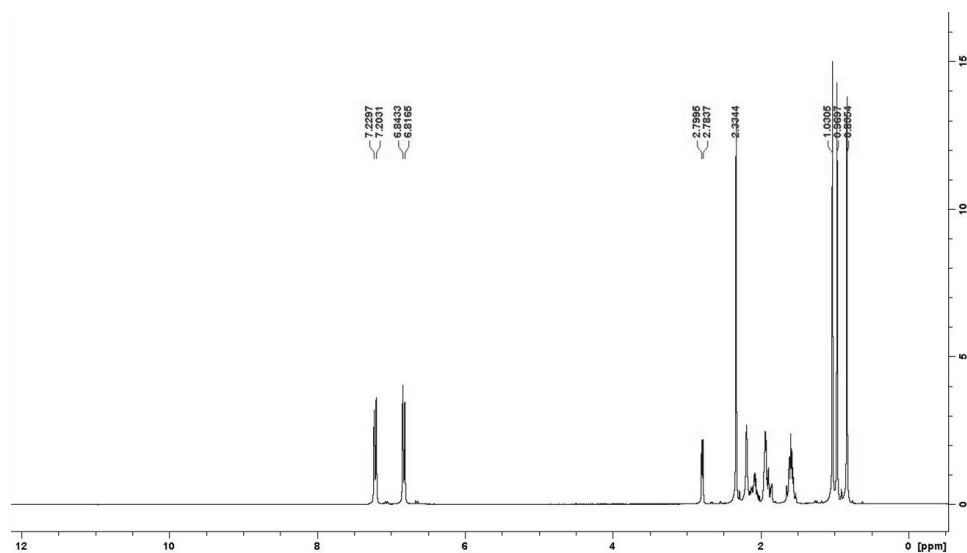

- <sup>13</sup>C NMR

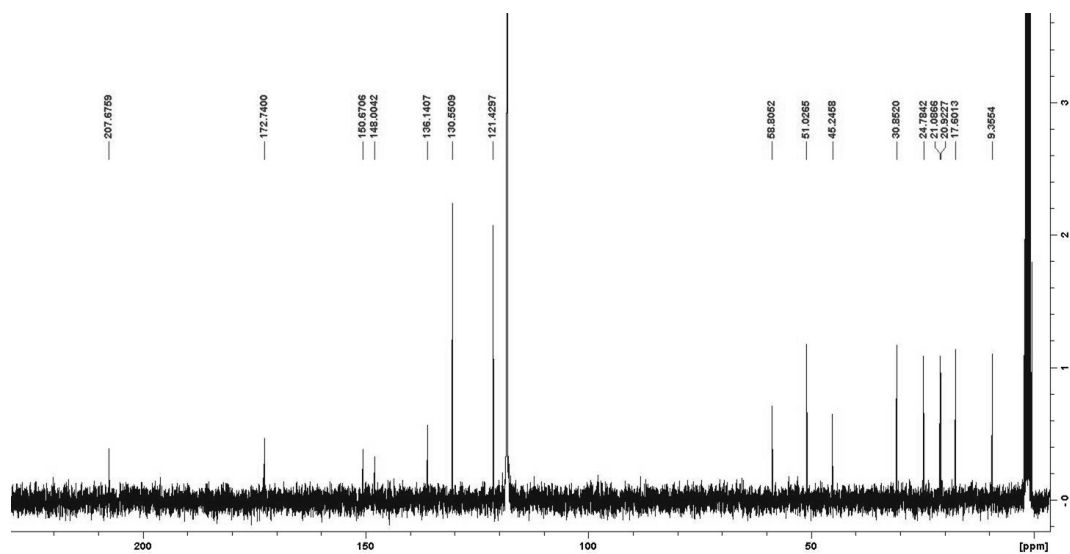

Compound **7** -  $\text{K}[\text{Au}(\text{CN})_2(\text{OC}_{10}\text{H}_{14}\text{NC}_6\text{H}_4\text{CH}_3)_2] \cdot \frac{1}{2}\text{Et}_2\text{O}$

- FTIR

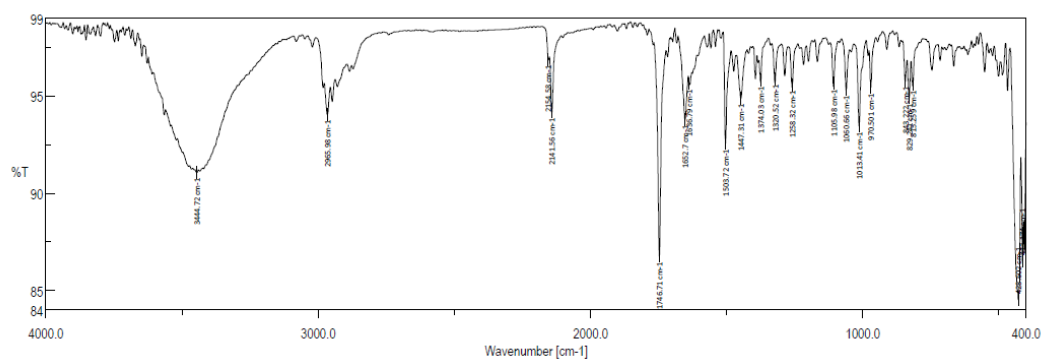

- <sup>1</sup>H NMR

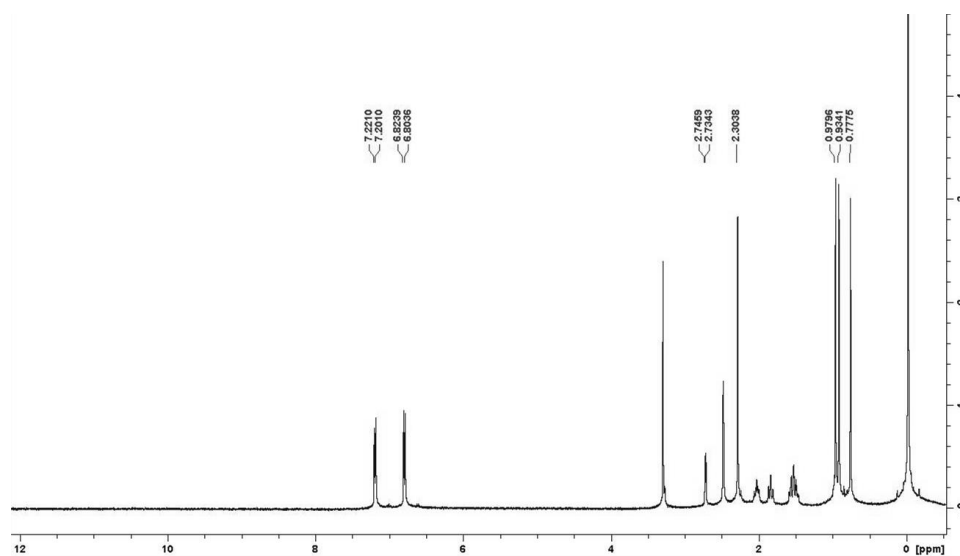

- <sup>13</sup>C NMR

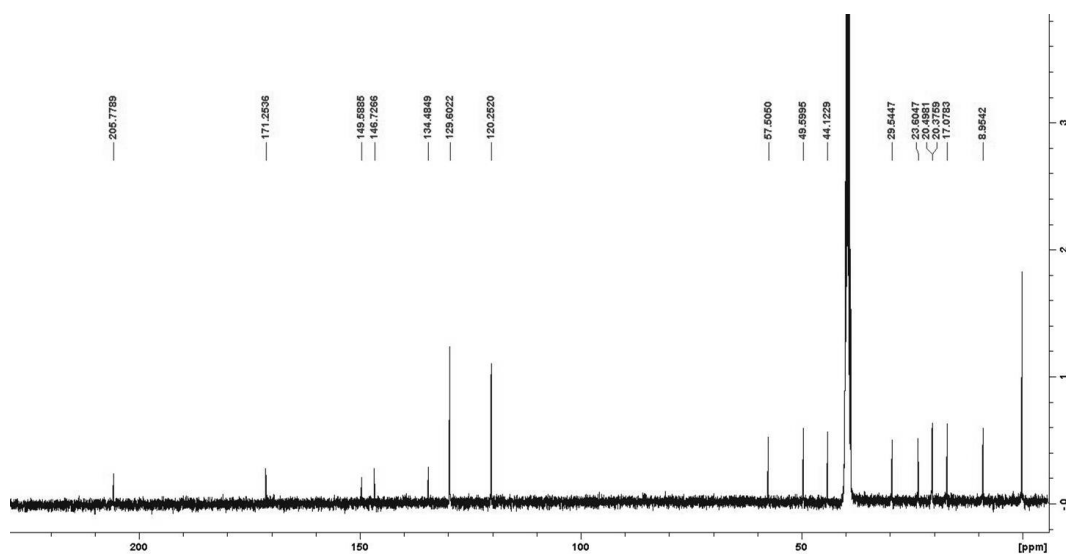



Compound **8** -  $K_3[\{Au(CN)_2\}_3(OC_{10}H_{14}NC_6H_4OH-m)]$

- FTIR

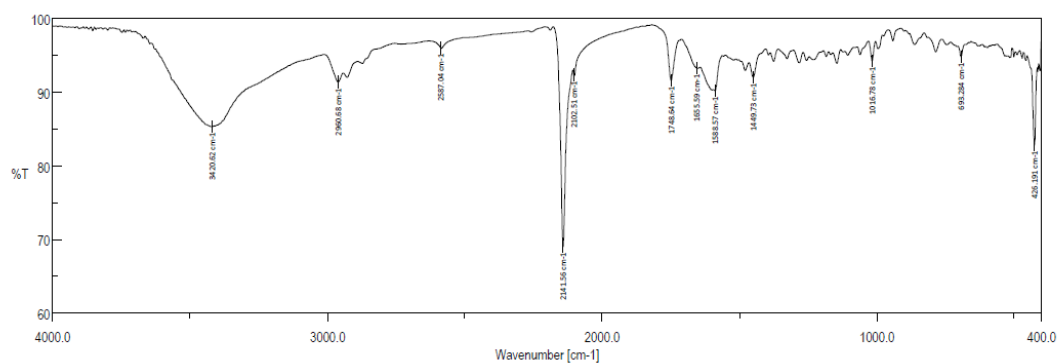

- $^1H$  NMR

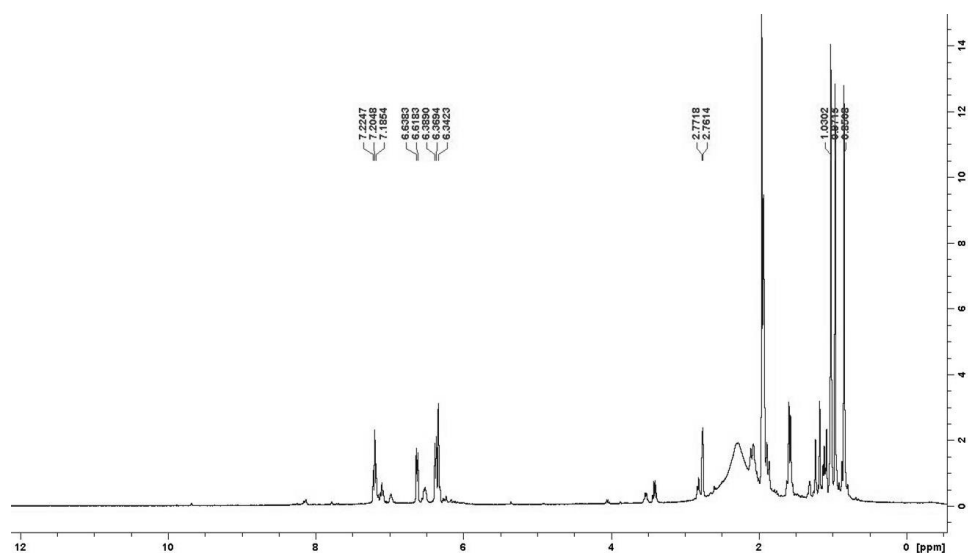

- $^{13}C$  NMR

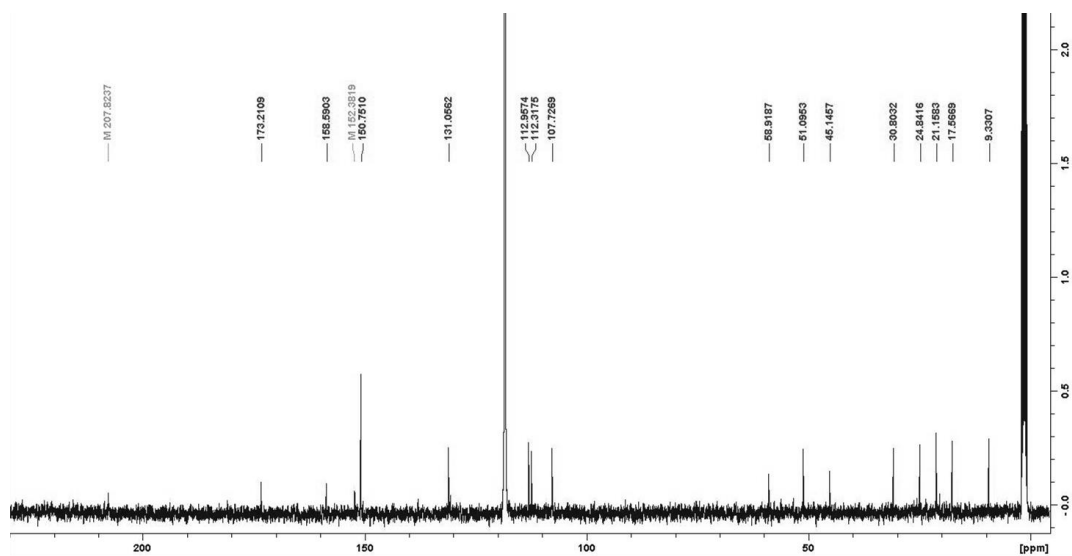

Compound **9** -  $\text{K}[\text{Au}(\text{CN})_2(\text{OC}_{10}\text{H}_{14}\text{NNH}_2)]$

- FTIR

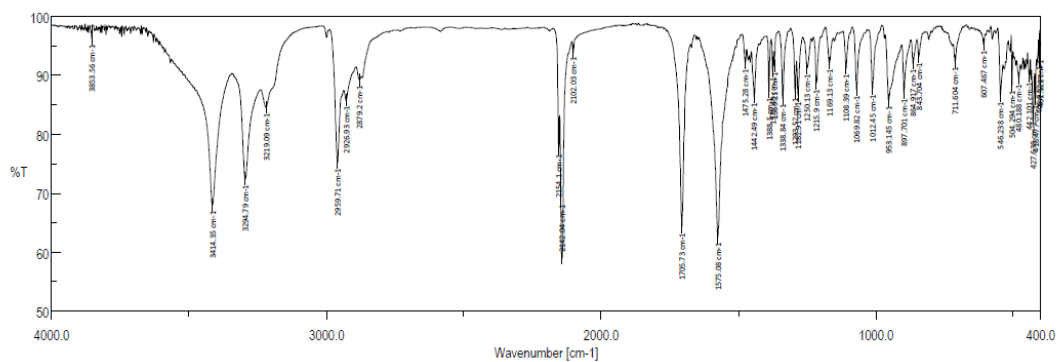

- $^1\text{H}$  NMR

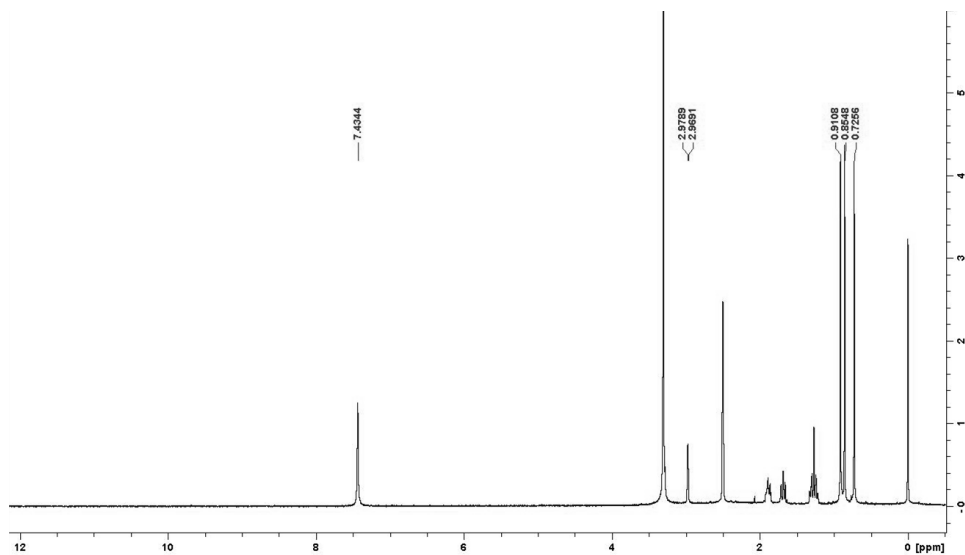

- $^{13}\text{C}$  NMR

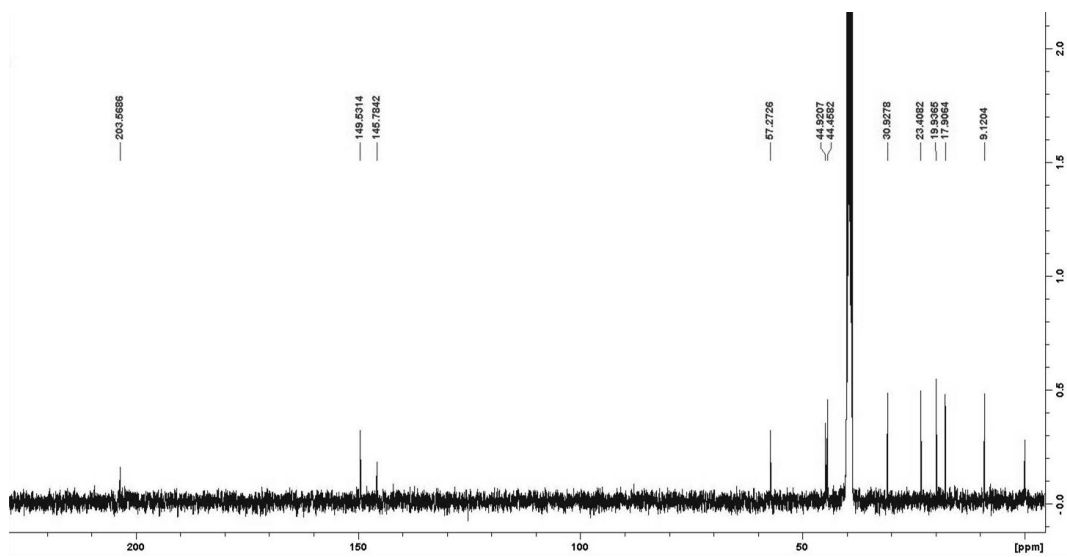

Compound **10** -  $\text{K}[\text{Au}(\text{CN})_2(\text{OC}_{10}\text{H}_{14}\text{NOH})_2]^{-1/2}\text{H}_2\text{O}$

- FTIR

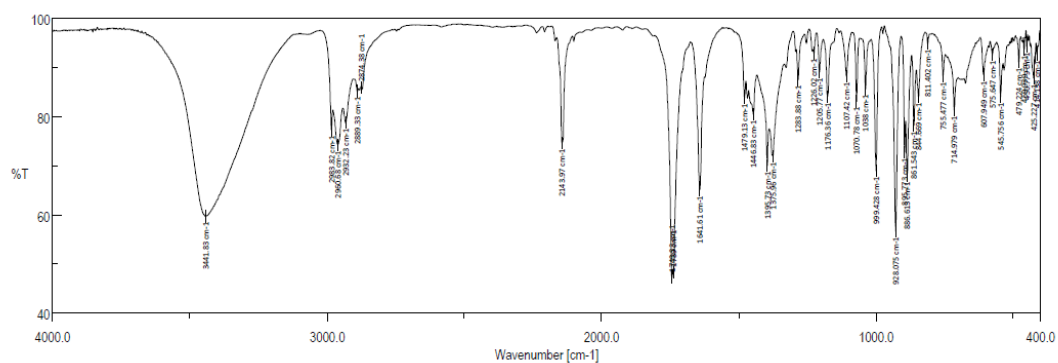

- $^1\text{H}$  NMR

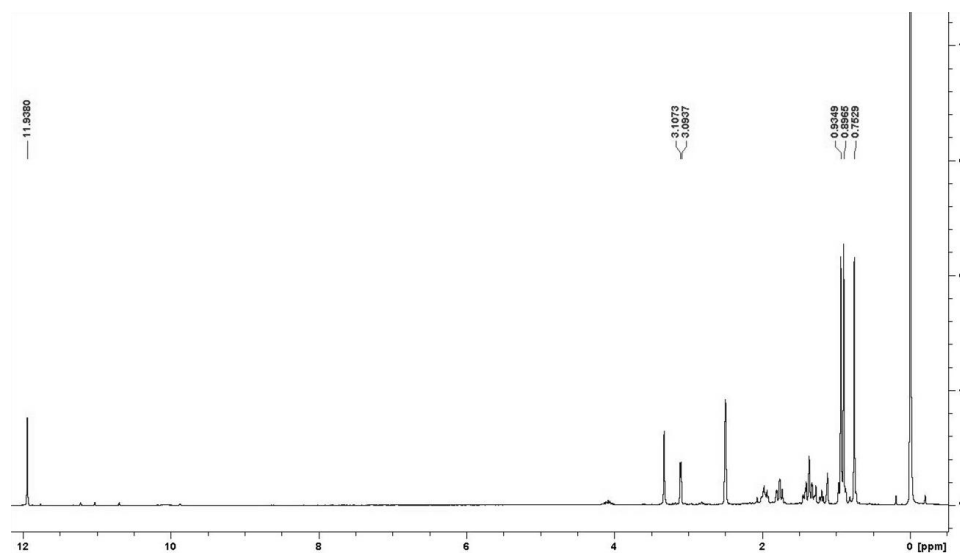

- $^{13}\text{C}$  NMR

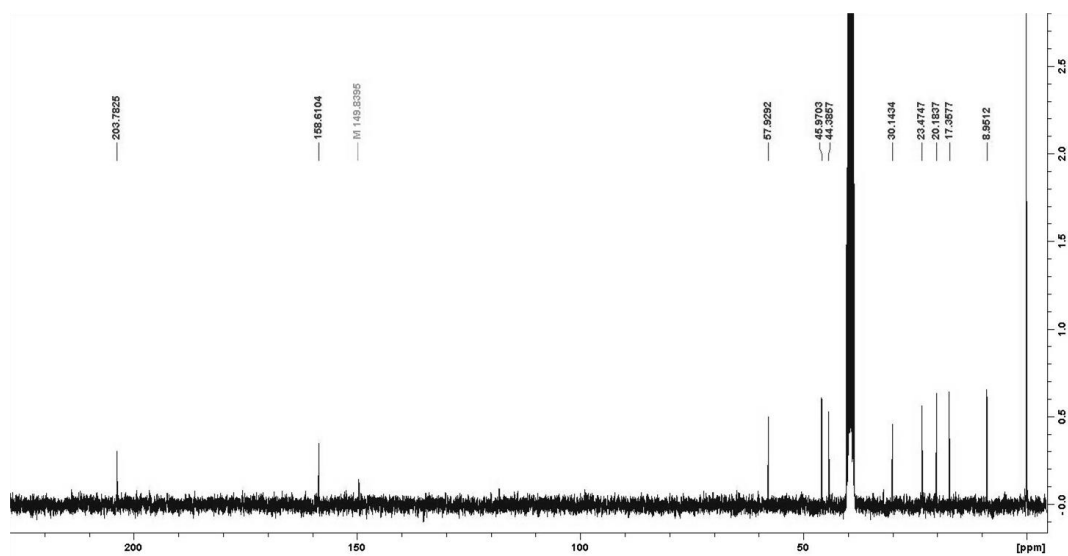

Compound **11** -  $\text{K}_3[\{\text{Au}(\text{CN})_2\}_3(\text{C}_{10}\text{H}_{14}\text{NC}_6\text{H}_4\text{N})] \cdot \text{H}_2\text{O}$

- FTIR

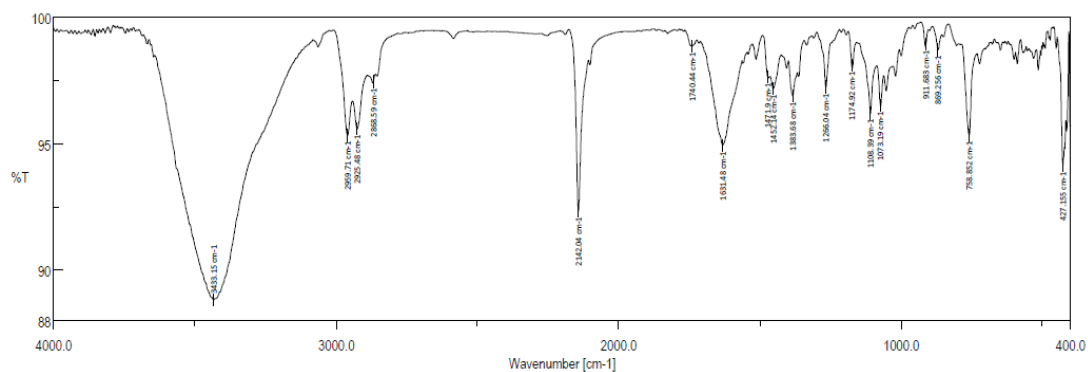

- $^1\text{H}$  NMR

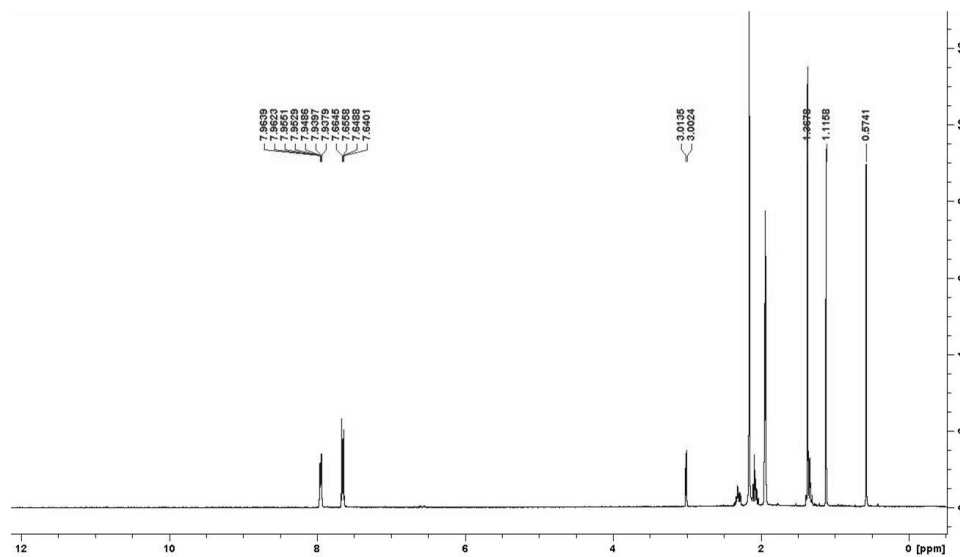

- $^{13}\text{C}$  NMR

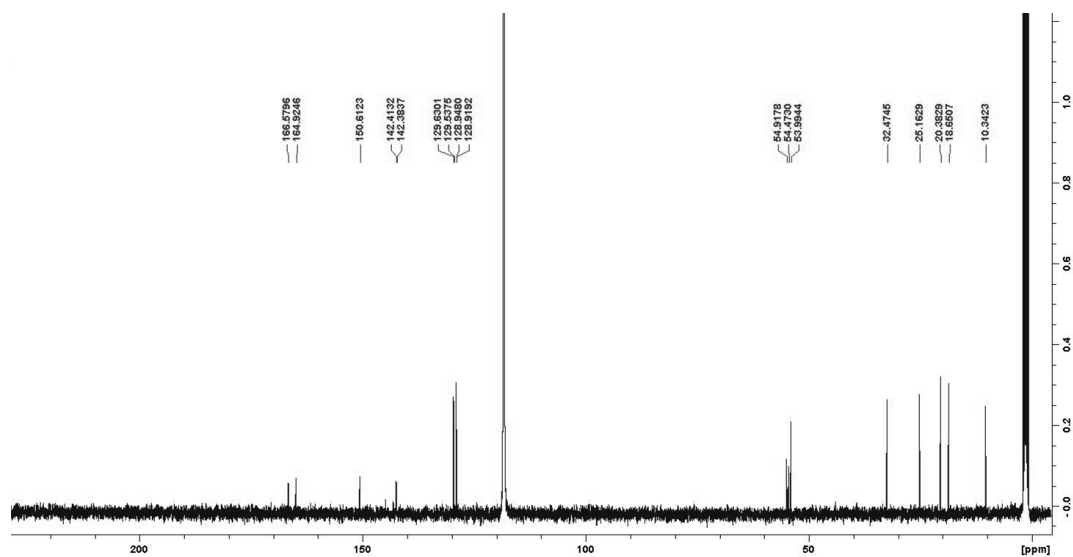

Compound **12** -  $\text{K}[\text{Au}(\text{CN})_2(\text{C}_{10}\text{H}_{14}\text{NC}_6\text{H}_4\text{N})_3]\cdot\text{H}_2\text{O}$

- FTIR

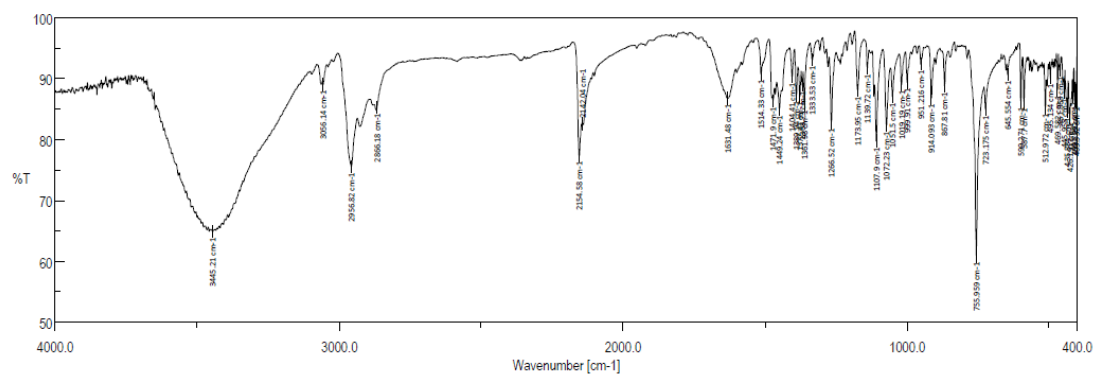

- <sup>1</sup>H NMR

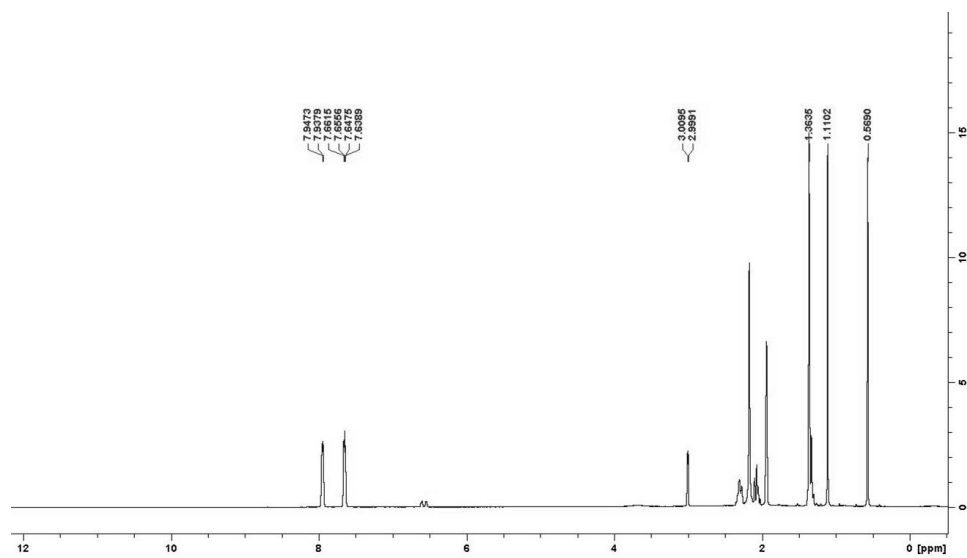

- <sup>13</sup>C NMR

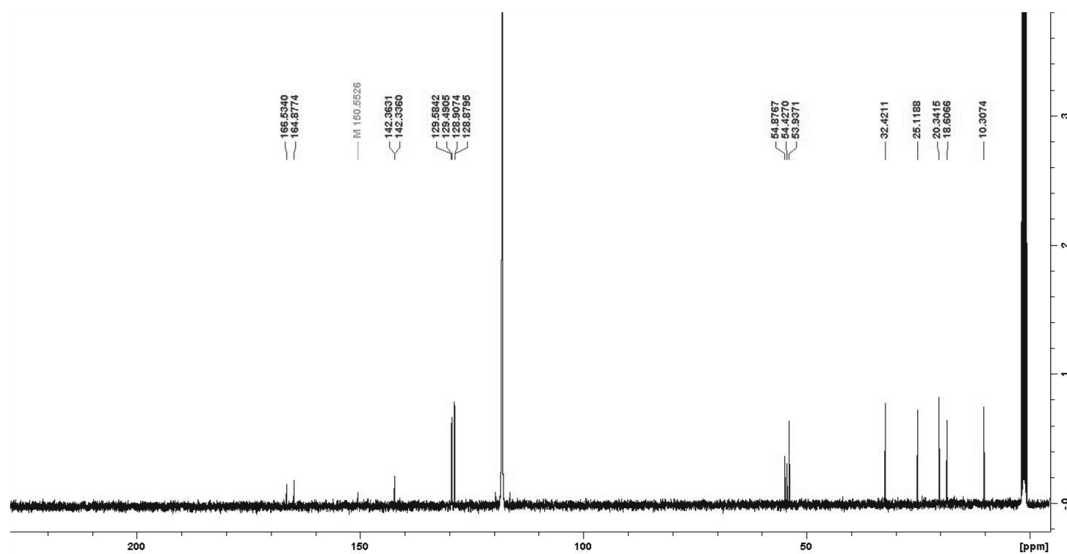

Compound **13** -  $[\text{Au}(\text{CN})\{(\text{OC}_{10}\text{H}_{14}\text{N})_2\text{C}_6\text{H}_4\text{-}m\}]\cdot\text{CH}_3\text{CN}$

- FTIR

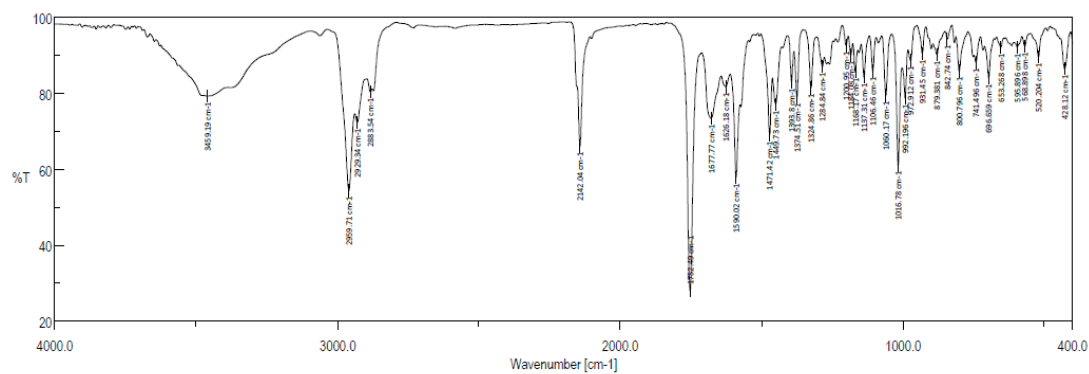

- $^1\text{H}$  NMR

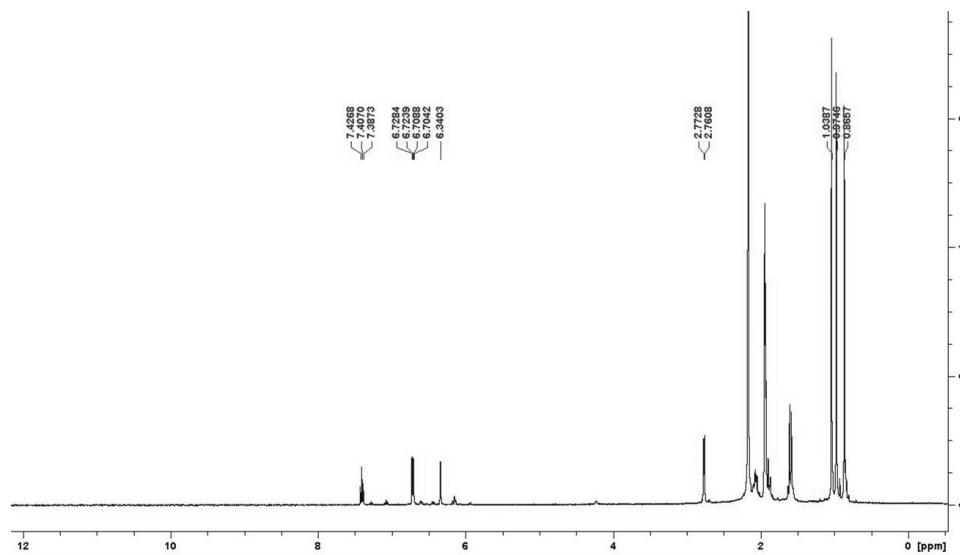

- $^{13}\text{C}$  NMR

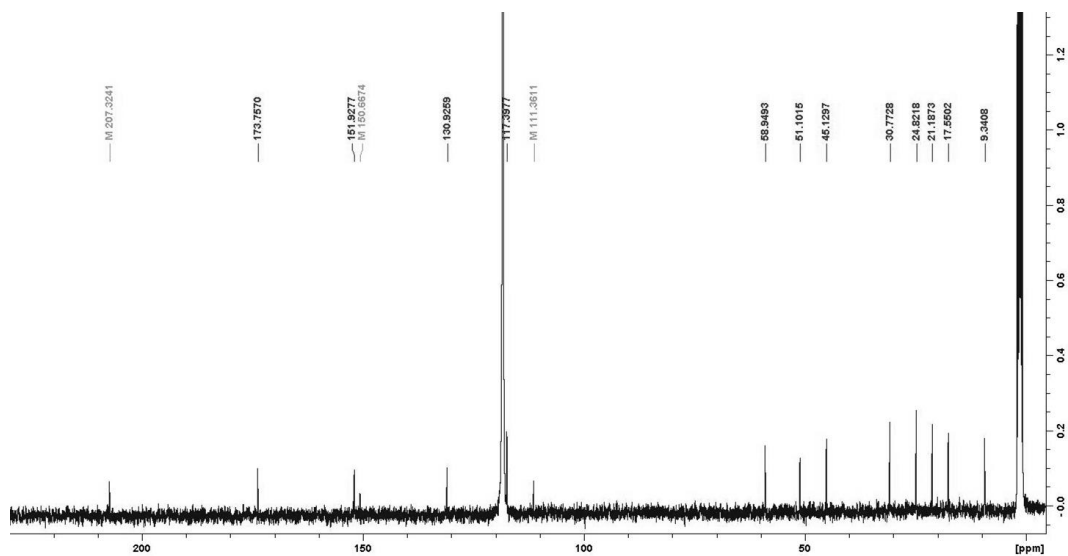

Compound **14** -  $K_3[\{Au(CN)_2\}_3\{(OC_{10}H_{14}N)_2C_6H_4-p\}]\cdot 3H_2O$

- FTIR

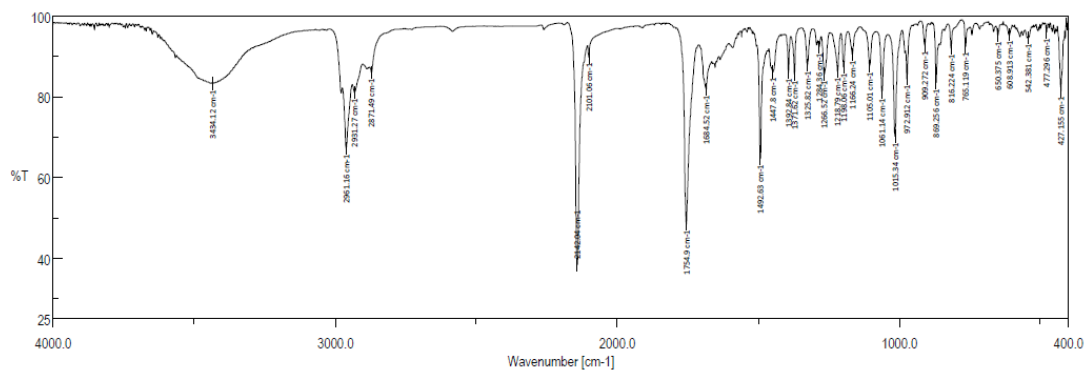

- <sup>1</sup>H NMR

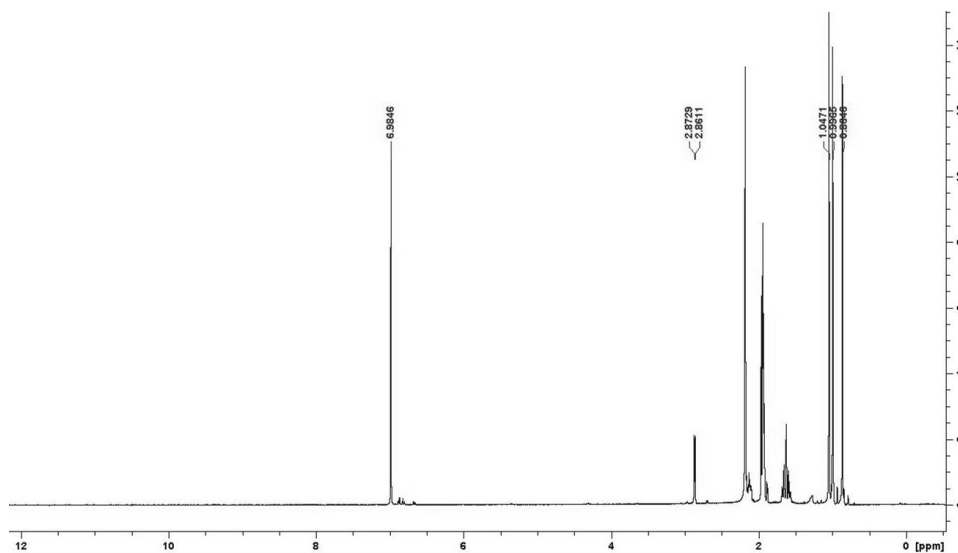

- <sup>13</sup>C NMR

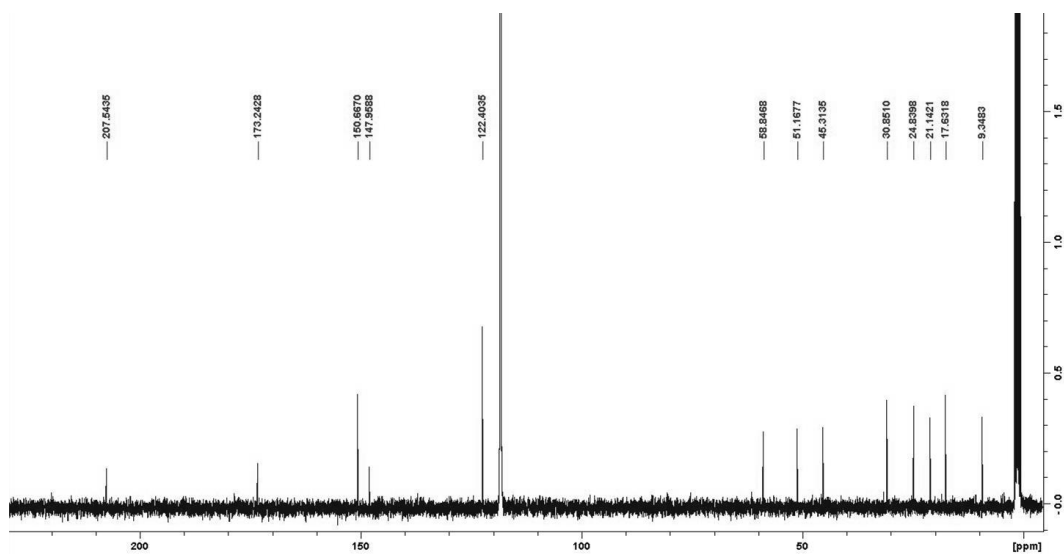

Supplement: s1 [file s1]
